# Supplementary material for: Addressing issues of vaccination literacy and psychological empowerment in the measles-mumps-rubella (MMR) vaccination decision-making: a qualitative study
Source: Springer Nature journal article supplement (doi:10.1186/s12889-015-2200-9), 2015-09-01
Supplement: MOESM1 [file 9750234]

## Appendix 1. Interview schedule

| Interview topics and sub-topics                 | Key interview questions                                                                                                                   |
|-------------------------------------------------|-------------------------------------------------------------------------------------------------------------------------------------------|
| 1. Confidence in one's MMR vaccination decision | → How confident are you in your decision about the MMR vaccination for your child?                                                        |
| 2. Vaccination literacy                         |                                                                                                                                           |
| <i>General beliefs</i>                          | → What do you think of the MMR vaccination?                                                                                               |
| <i>Procedural knowledge</i>                     | → When is MMR due for your child?                                                                                                         |
| <i>Subjective knowledge</i>                     | → Do you feel sufficiently informed about the MMR vaccination?                                                                            |
| <i>Perceived outcomes of MMR</i>                | → What comes to your mind when you think of the positive outcomes of the MMR vaccination?                                                 |
|                                                 | → What comes to your mind when you think of the negative outcomes of the MMR vaccination?                                                 |
| <i>Information seeking behaviors</i>            | → Which sources did you use?                                                                                                              |
|                                                 | → Which sources have contributed most to your decision-making?                                                                            |
| 3. Empowerment                                  |                                                                                                                                           |
| <i>Meaningfulness</i>                           | → What are the major decisions that you have made for your child so far?                                                                  |
|                                                 | → How important is your choice about the MMR vaccination compared to other decisions made for your child so far?                          |
| <i>Self-efficacy</i>                            | → What makes one able to make a sound decision about MMR?                                                                                 |
|                                                 | → What skills would one need to have in order to feel able? What does one need to know?                                                   |
| <i>Self-determination</i>                       | → In your opinion, what does it mean to be autonomous in making a decision regarding MMR?                                                 |
| <i>Impact</i>                                   | → Under which circumstances would you feel that your decision regarding MMR did make a difference?                                        |
| 4. Social influences                            | → Have you talked about the MMR vaccination with someone?                                                                                 |
|                                                 | → Where and with whom?                                                                                                                    |
|                                                 | → What have you been told?                                                                                                                |
| 5. Reactions to MMR-related information         | → Think of the last time you came across information on the MMR vaccination. Was there any information that made you particularly scared? |
|                                                 | → Was there any information that made you particularly secure and relieved?                                                               |
| 6. CAM usage                                    | → Do you use complementary or alternative medicines (CAM)?                                                                                |
|                                                 | → What comes to your mind when you think of CAM and measles?                                                                              |
| 7. Perceived risk of MMR and measles            | → What comes to your mind when you think of the probability that your child will contract measles?                                        |
|                                                 | → What comes to your mind when you think of its severity?                                                                                 |
|                                                 | → What comes to your mind when you think of the probability that your child will have MMR side effects?                                   |
|                                                 | → What comes to your mind when you think of their severity?                                                                               |
| 8. Barriers to the decision                     | → Was there anything that frustrated you during your decision-making?                                                                     |
